# Supplementary material for: Lower blood lipid level from the administration of plant tannins via altering the gut microbiota diversity and structure
Source: Royal Society of Chemistry journal article supplement (doi:10.1039/d2fo03206f), 2023-01-01
Supplement: d2fo03206f1.pdf [file d2fo03206f1.pdf]

## 1 Supplementary

### 2 Table S1. Ingredients and Chemical Composition of Dietary

| Item                   | Group |      |      |         |
|------------------------|-------|------|------|---------|
|                        | NC    | TA   | GSPE | TA+GSPE |
| Ingredients, % DM      |       |      |      |         |
| Alfalfa                | 70    | 70   | 70   | 70      |
| Commercial concentrate | 30    | 30   | 30   | 30      |
| TA                     | 0     | 0.5  | 0    | 0.25    |
| GSPE                   | 0     | 0    | 0.5  | 0.25    |
| Chemical composition   |       |      |      |         |
| DM, %                  | 90.4  | 90.4 | 90.4 | 90.4    |
| OM, % DM               | 88.4  | 88.4 | 88.4 | 88.4    |
| CP, % DM               | 15.5  | 15.4 | 15.4 | 15.4    |
| EE, % DM               | 1.95  | 1.95 | 1.95 | 1.95    |
| ADF, % DM              | 31.1  | 31.1 | 31.1 | 31.1    |
| NDF, % DM              | 49.7  | 49.7 | 49.7 | 49.7    |
| GE, MJ/kg DM           | 15.8  | 15.8 | 15.8 | 15.8    |

3 TA, Chinese gallnut tannic; GSPE, grape seeds procyanidins; DM, dry matter; OM, organic matter;

4 CP, crude protein; EE, crude fat; ADF, acid detergent fiber; NDF, neutral detergent fiber; GE, Gross

5 energy.

7 **Figure S1.** The chemical structures of the two tannins. Tannic acid<sup>1</sup> (a) and procyanidins<sup>2</sup> (b).

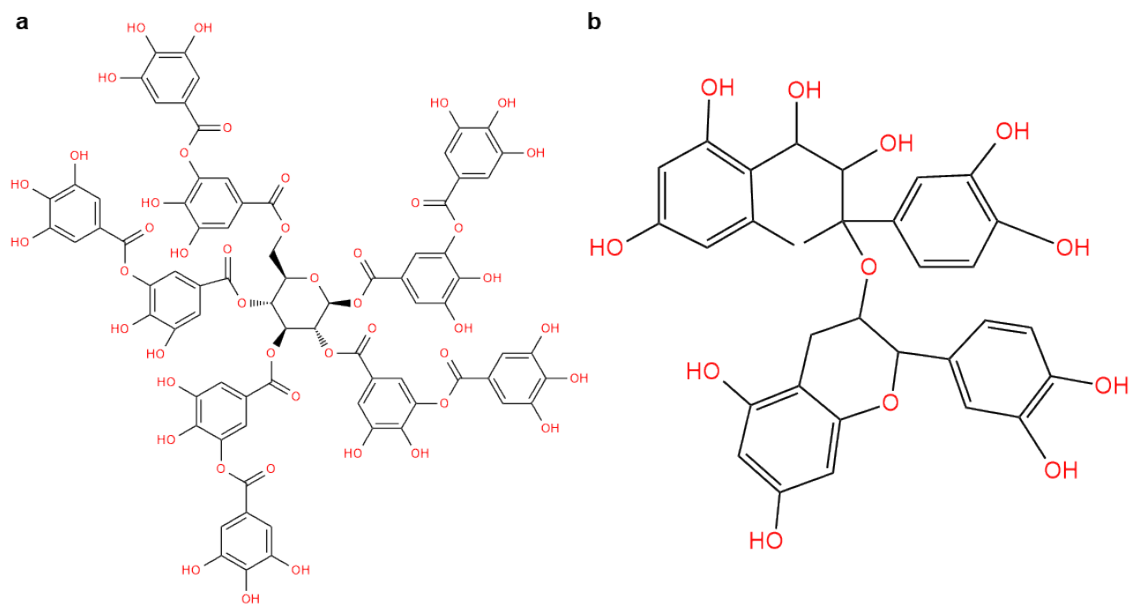

10 **Figure S2.** The relative abundance of jejunal and colonic bacteria. (a) Firmicutes, Verrucomicrobia,  
 11 Actinobacteria and Bacteroidetes are the top 4 relative abundance phyla in jejunum; (b) Firmicutes,  
 12 Bacteroidetes, Verrucomicrobia and Proteobacteria are the highest abundant phyla in colon. \*  $p <$   
 13 0.05 ( $t$ -test).

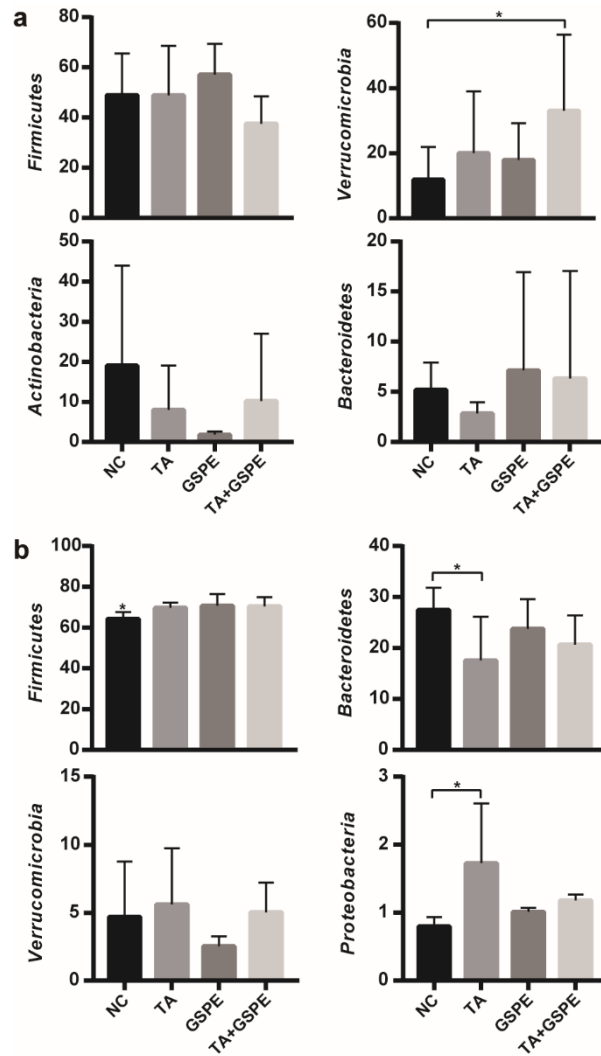

16 **Figure S3.** Interaction network of gut bacteria. The correlation analysis of jejunal bacteria (a),  
 17 colonic bacteria (b) at the genus level. Each node denotes one genus and the same-colored nodes  
 18 belong to one order as label shown. In addition, the diameter of the node reflects node (genus)  
 19 relative importance in network.

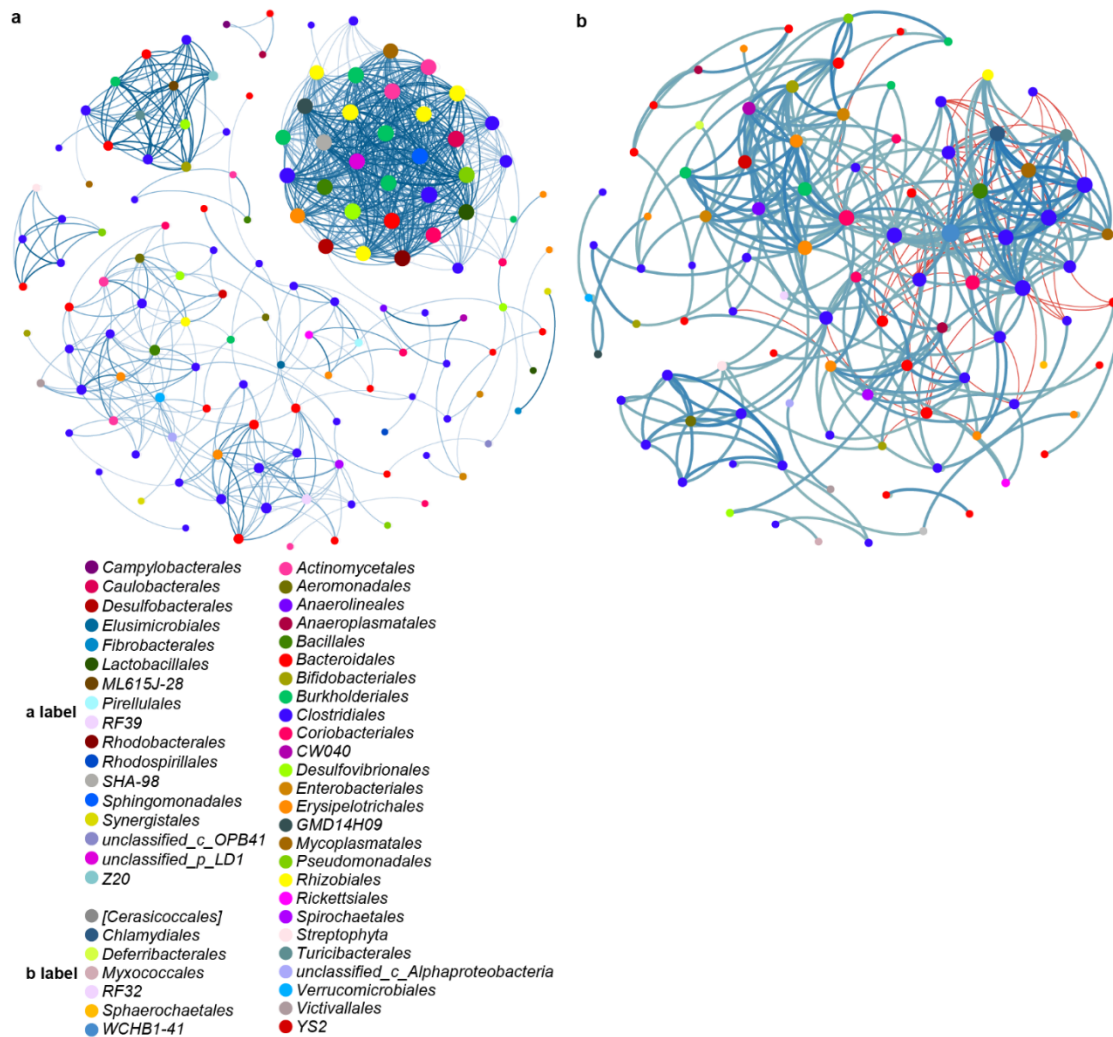

22 **Figure S4.** Histogram of differentially abundant taxa between control and treatment groups. The  
 23 LDA scores are calculated by LefSe. (a) (b) (c) show the taxa with significant difference between  
 24 NC and TA group, NA and GSPE group, NC and TA+GSPE group, respectively, in jejunum. (d)  
 25 (e) (f) show the taxa with significant difference between NC and TA group, NA and GSPE group,  
 26 NC and TA+GSPE group, respectively, in colon.

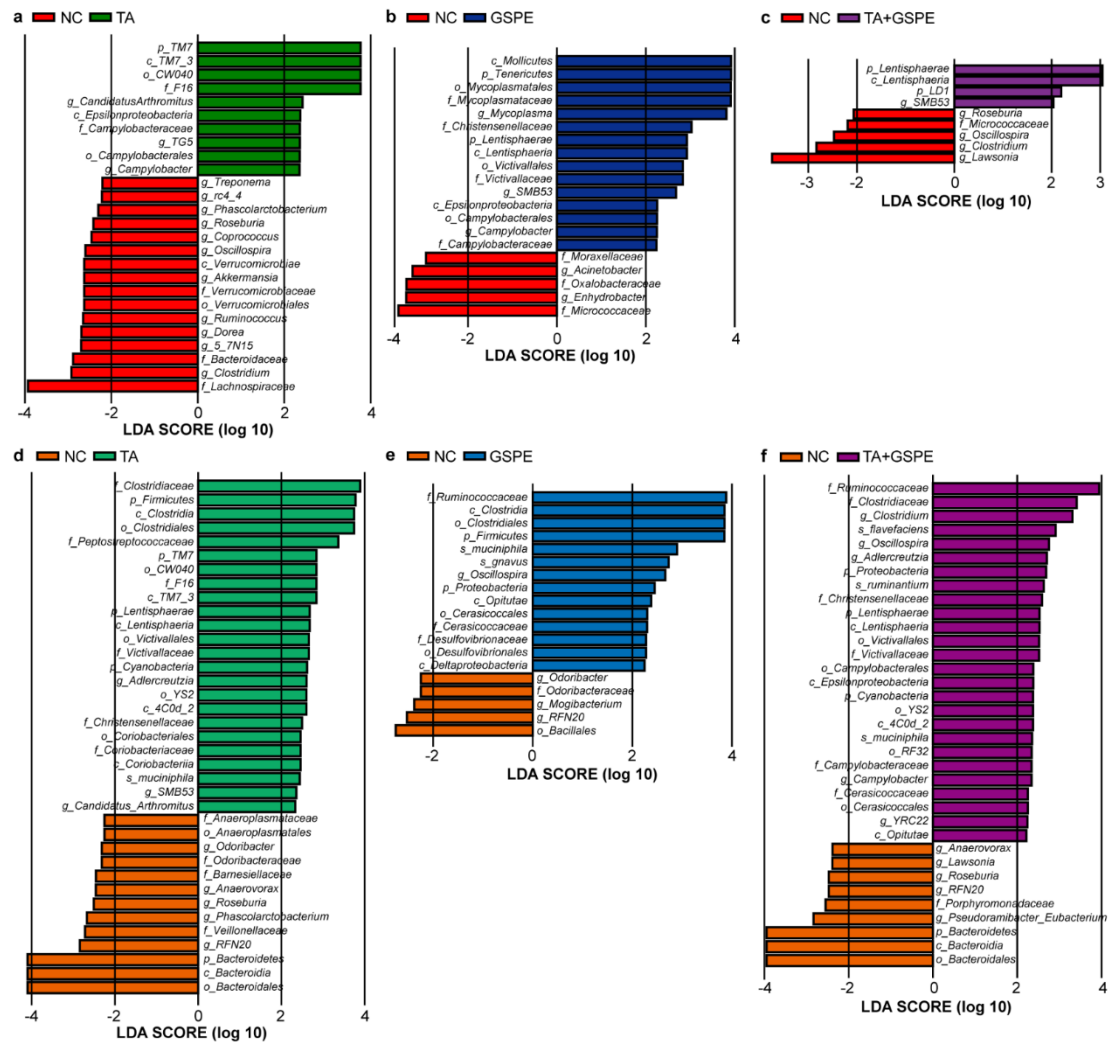



35 **Figure S6.** Heatmaps of the correlation between immune parameters and genera in jejunum and  
 36 colon. The correlation between inflammatory cytokines and genera. Heatmaps was created  
 37 according to the result of Pearson correlation analysis. The significant correlations are presented as  
 38 \*  $p < 0.05$ , \*\*  $p < 0.01$ , \*\*\*  $p < 0.001$ ).

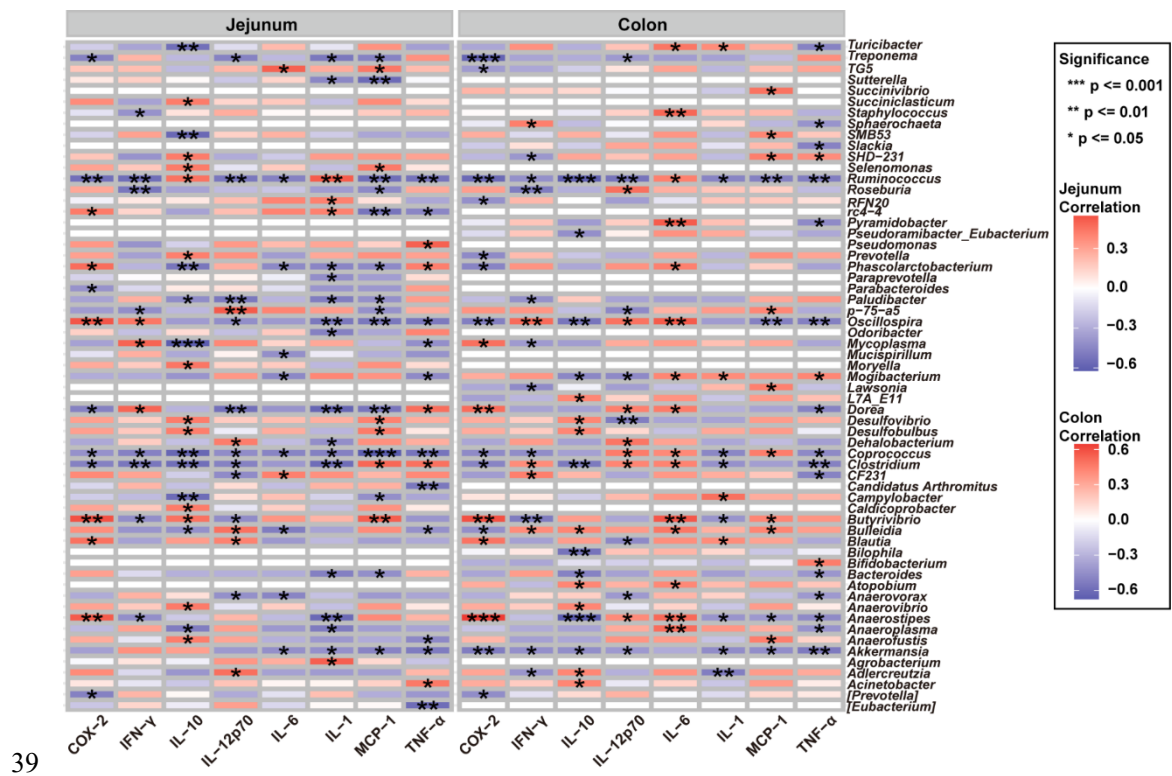

41 **Figure S7.** Tannins alter gut microbiota metabolic functions in jejunum and colon. With  
 42 supplying different polyphenols, the minified potential function of jejunal and colonic  
 43 microbiota is signed by black arrow, while raised that is marked with green arrow, compared  
 44 to NC. Statistical differences are analyzed by *t*-test between NC and other 3 groups. DDT:  
 45 1,1,1-Trichloro-2,2-bis(4-chlorophenyl) ethane.

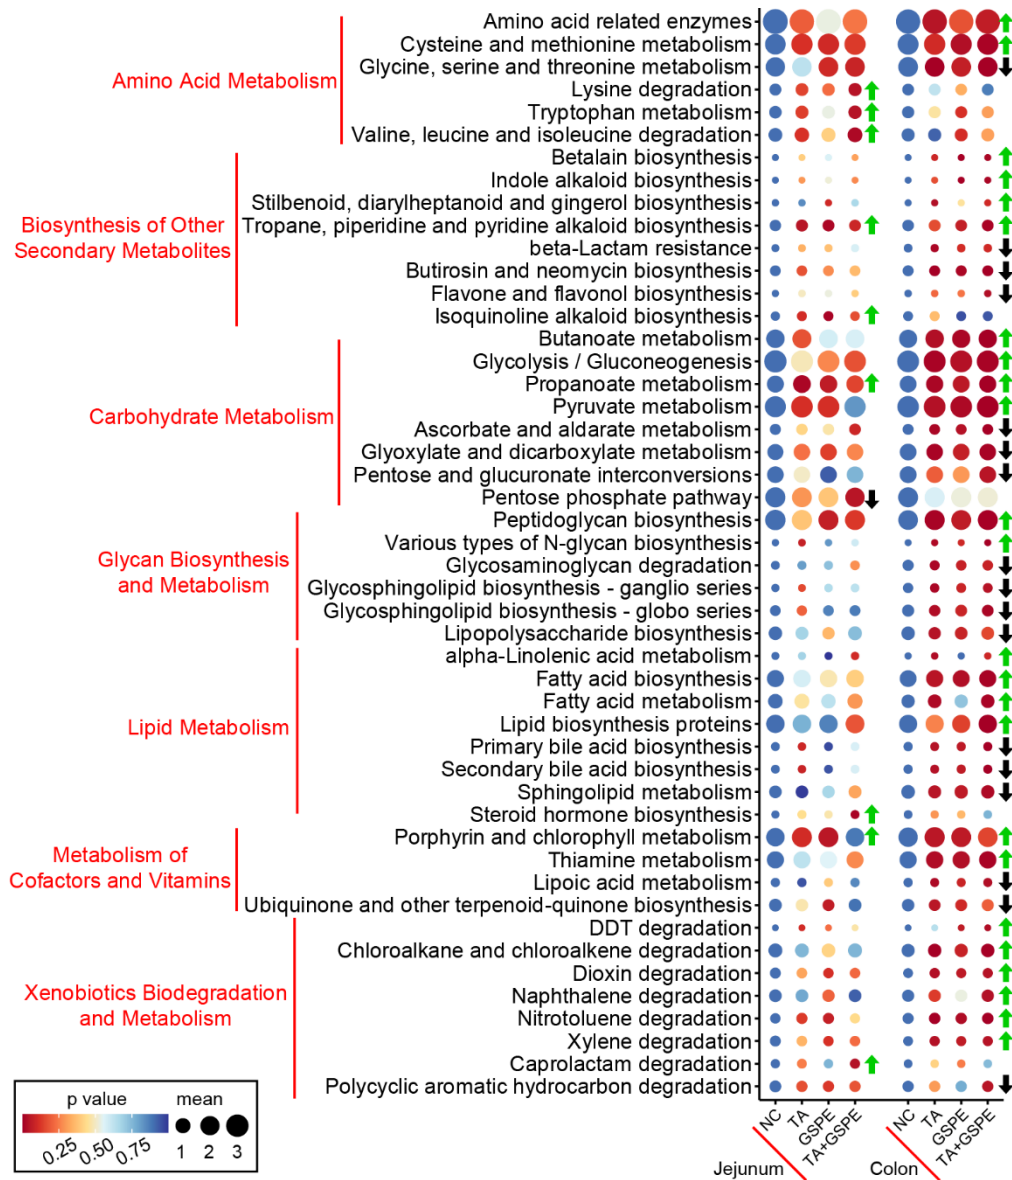



48 **Supplemental References:**

49 (1) National Center for Biotechnology Information. PubChem Compound Summary for CID  
50 16129778, Tannic acid. <https://pubchem.ncbi.nlm.nih.gov/compound/Tannic-acid>. Accessed June  
51 16, 2022.

52 (2) National Center for Biotechnology Information. PubChem Compound Summary for CID  
53 107876, Procyanidin. <https://pubchem.ncbi.nlm.nih.gov/compound/Procyanidin>. Accessed June 16,  
54 2022.
